# Supplementary material for: Structure and chemistry of surface-doped Pt:SnO2 gas sensing materials
Source: Royal Society of Chemistry journal article supplement (doi:10.1039/c5ra26302f), 2016-01-01
Supplement: c5ra26302f1.pdf [file c5ra26302f1.pdf]

## Structure and chemistry of surface-doped Pt:SnO<sub>2</sub> gas sensing materials

Received 00th January 20xx,  
Accepted 00th January 20xx

David Degler<sup>a</sup>, Hudson W. Pereira de Carvalho<sup>b,c</sup>, Kristina Kvashnina<sup>d,e</sup>, Jan-Dierk Grunwaldt<sup>b</sup>, Udo Weimar<sup>a</sup> and Nicolae Barsan<sup>a†</sup>

DOI: 10.1039/x0xx00000x

www.rsc.org/

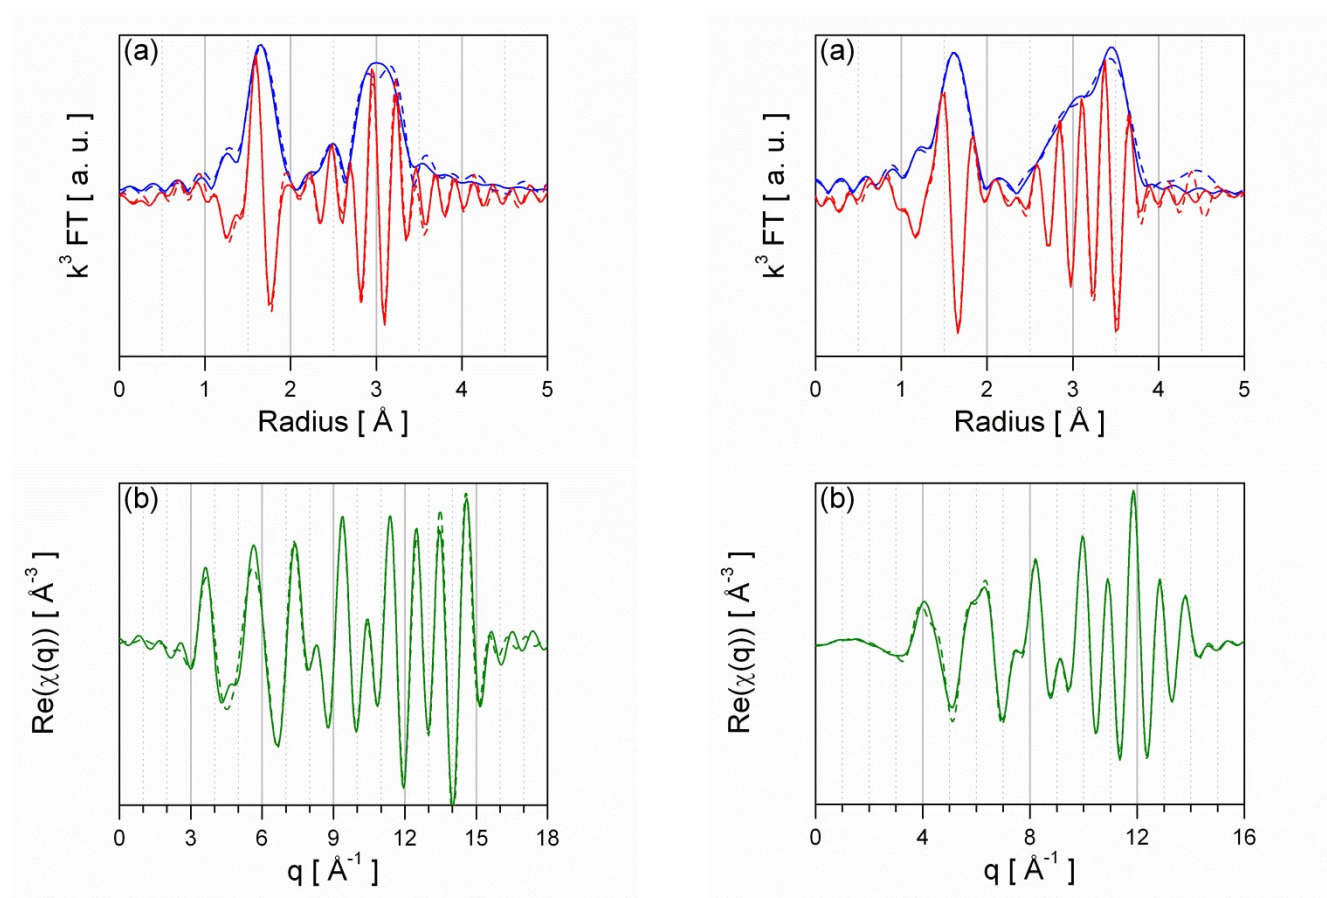

ESI 1 – EXAFS fit (a) and (b) PtO<sub>2</sub> (data = dashed, straight line = fit)

ESI 2 – EXAFS fit (a) and (b) SnO<sub>2</sub> (data = dashed, straight line = fit)

<sup>a</sup> University of Tübingen, Institute of Physical and Theoretical Chemistry, Auf der Morgenstelle 15, 72076 Tübingen, Germany Address here.

<sup>b</sup> Karlsruhe Institute of Technology, Institute for Chemical Technology and Polymer Chemistry, Engesserstr. 20, 76131 Karlsruhe, Germany

<sup>c</sup> Centro de Energia Nuclear na Agricultura, Universidade de São Paulo, P.O. Box 96, 13400-970, Piracicaba, SP, Brazil

<sup>d</sup> ESRF, BP220, 6 rue Jules Horowitz, 38043 Grenoble, France

<sup>e</sup> Helmholtz-Zentrum Dresden-Rossendorf (HZDR), Institute of Resource Ecology, P.O. Box 510119, 01314, Dresden, Germany

† Corresponding author: Tel. +49 7071 29 78761, E-mail: nb@ipc.uni-tuebingen.de

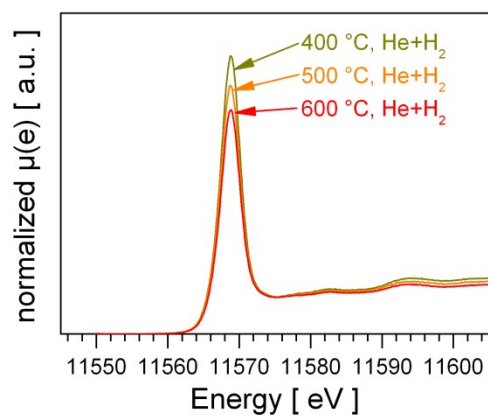

ESI 3 - TPR-XANES spectra recorded from Pt:SnO<sub>2</sub> GI sensor in 2 % vol. H<sub>2</sub> in He at 400, 500 and 600 °C. The raw data was taken from reference 25 of the main manuscript and treated in the same way as the data shown in in figure 4.
